# Supplementary material for: Impact of Deficit Irrigation on Grapevine cv. ‘Touriga Nacional’ during Three Seasons in Douro Region: An Agronomical and Metabolomics Approach
Source: MDPI journal article supplement (doi:10.3390/plants11060732), 2022-03-09
Supplement: s1 [file s1]

# Impact of Deficit Irrigation on Grapevine cv. ‘Touriga Nacional’ during Three Seasons in Douro Region: An Agronomical and Metabolomics Approach

Inês L. Cabral <sup>1</sup>, António Teixeira <sup>2</sup>, Arnaud Lanoue <sup>3</sup>, Marianne Unlubayir <sup>3</sup>, Thibaut Munsch <sup>3</sup>, Joana Valente <sup>4</sup>, Fernando Alves <sup>4</sup>, Pedro Leal da Costa <sup>4</sup>, Frank S. Rogerson <sup>4</sup>, Susana M. P. Carvalho <sup>1</sup>, Hernâni Gerós <sup>2,\*</sup> and Jorge Queiroz <sup>1</sup>

<sup>1</sup> GreenUPorto—Research Centre on Sustainable Agrifood Production / Inov4Agro & DGAOT, Faculty of Sciences, University of Porto, Campus de Vairão, Rua da Agrária 747, 4485-646 Vairão, Portugal; ines.cabral@fc.up.pt (I.L.C.); susana.carvalho@fc.up.pt (S.M.P.C.); jqueiroz@fc.up.pt (J.Q)

<sup>2</sup> Centre of Molecular and Environmental Biology (CBMA), Department of Biology, Campus de Gualtar, University do Minho, 4710-057 Braga, Portugal; antonio.teixeira@bio.uminho.pt

<sup>3</sup> EA2106 Biomolécules et Biotechnologies Végétales, Université de Tours, 37200 Tours, France; arnaud.lanoue@univ-tours.fr (A.L.); marianne.unlubayir@univ-tours.fr (M.U.); thibaut.munsch@univ-tours.fr (T.M.)

<sup>4</sup> Symington Family Estates, Vinhos SA, Travessa Barão de Forrester 86, 4431-901 Vila Nova de Gaia, Portugal; joana.valente@symington.com (J.V.); fernando.alves@symington.com (F.A.); pedro.leal.costa@symington.com (P.L.d.C.); frank.rogerson@symington.com (F.S.R.)

\* Correspondence: geros@bio.uminho.pt; Tel.: (+351 253 605 812)

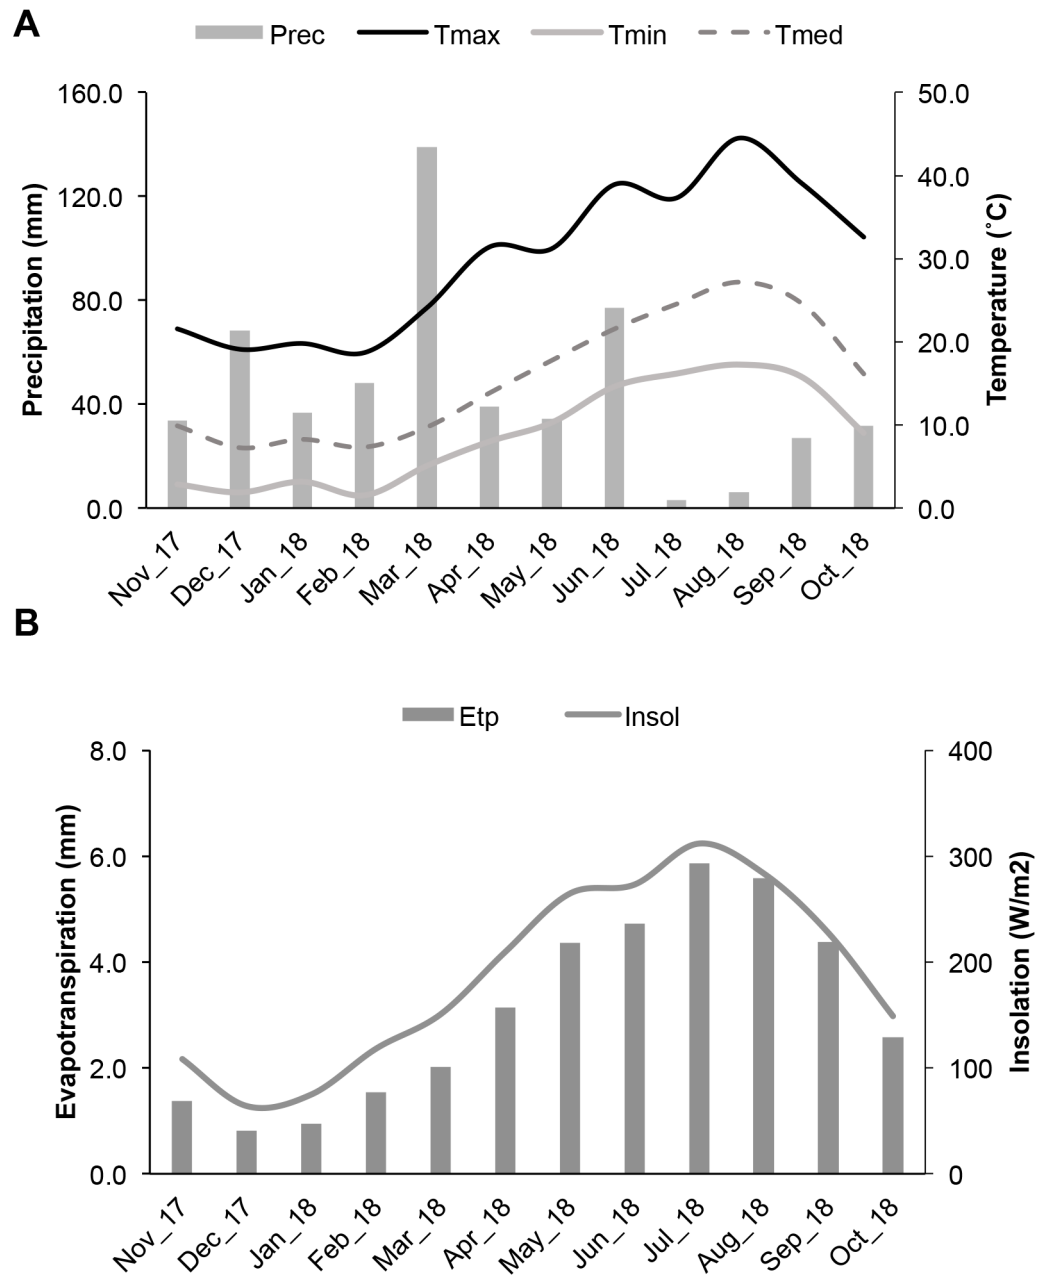

**Figure S1.** Monthly mean climatic conditions occurred during the 2018 vintage in the vineyard Quinta do Ataíde from the Douro Superior sub-region. **A)** Precipitation-Prec. (mm); Maximum temperature -Tmax-(°C); Minimum temperature – Tmin (°C) and Mean temperature – Tavg (°C). **B)** Evapotranspiration - Etp (mm); Insolation – Insol. (W/m<sup>2</sup>). Arrows indicate the occurrence of heat waves.

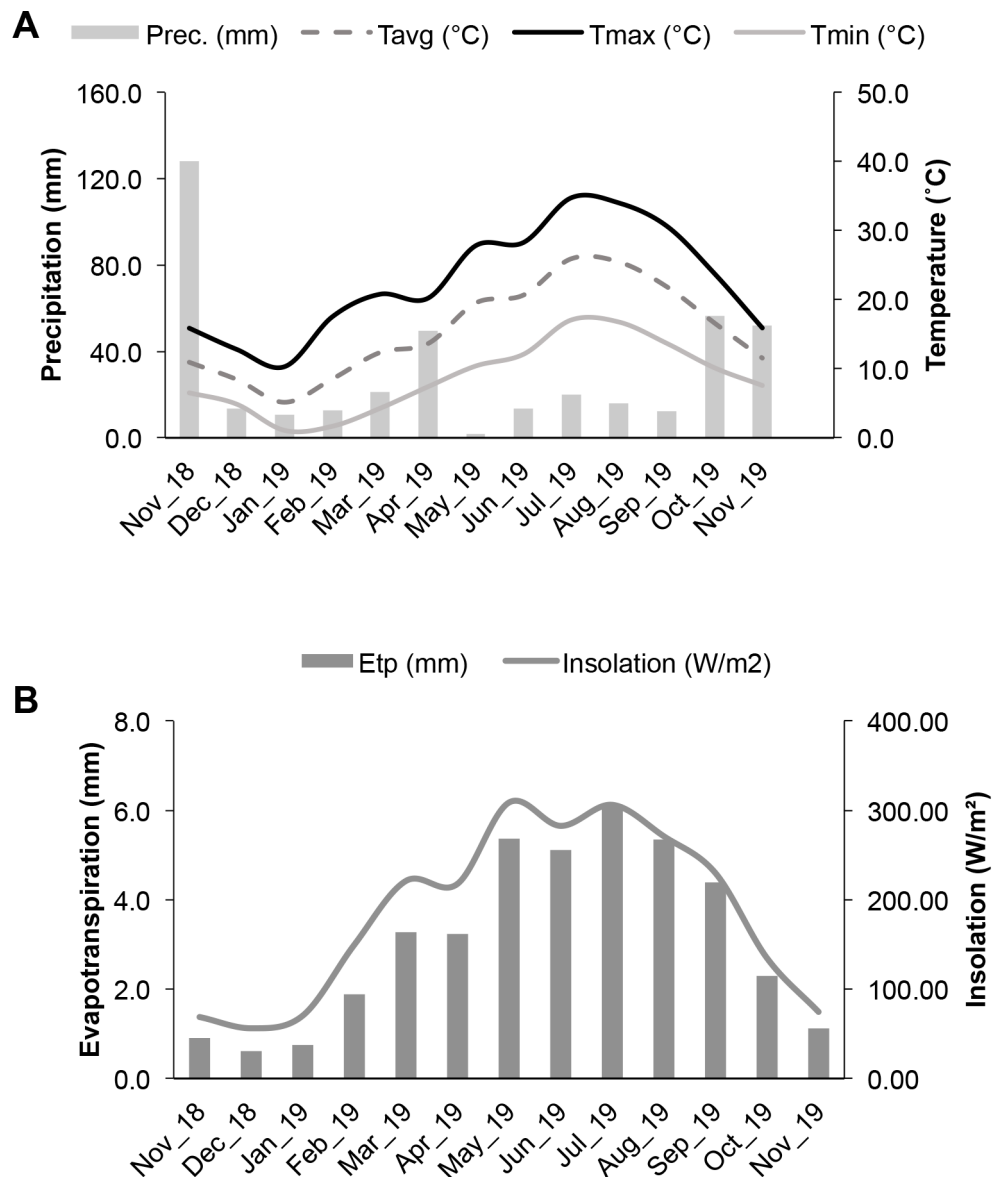

**Figure S2.** Monthly mean climatic conditions occurred during the 2019 vintage in the vineyard Quinta do Ataíde from the Douro Superior sub-region. **A)** Precipitation-Prec. (mm); Maximum temperature -Tmax-(°C); Minimum temperature – Tmin (°C) and Mean temperature – Tavg (°C). **B)** Evapotranspiration - Etp (mm); Insolation – Insol. (W/m<sup>2</sup>).

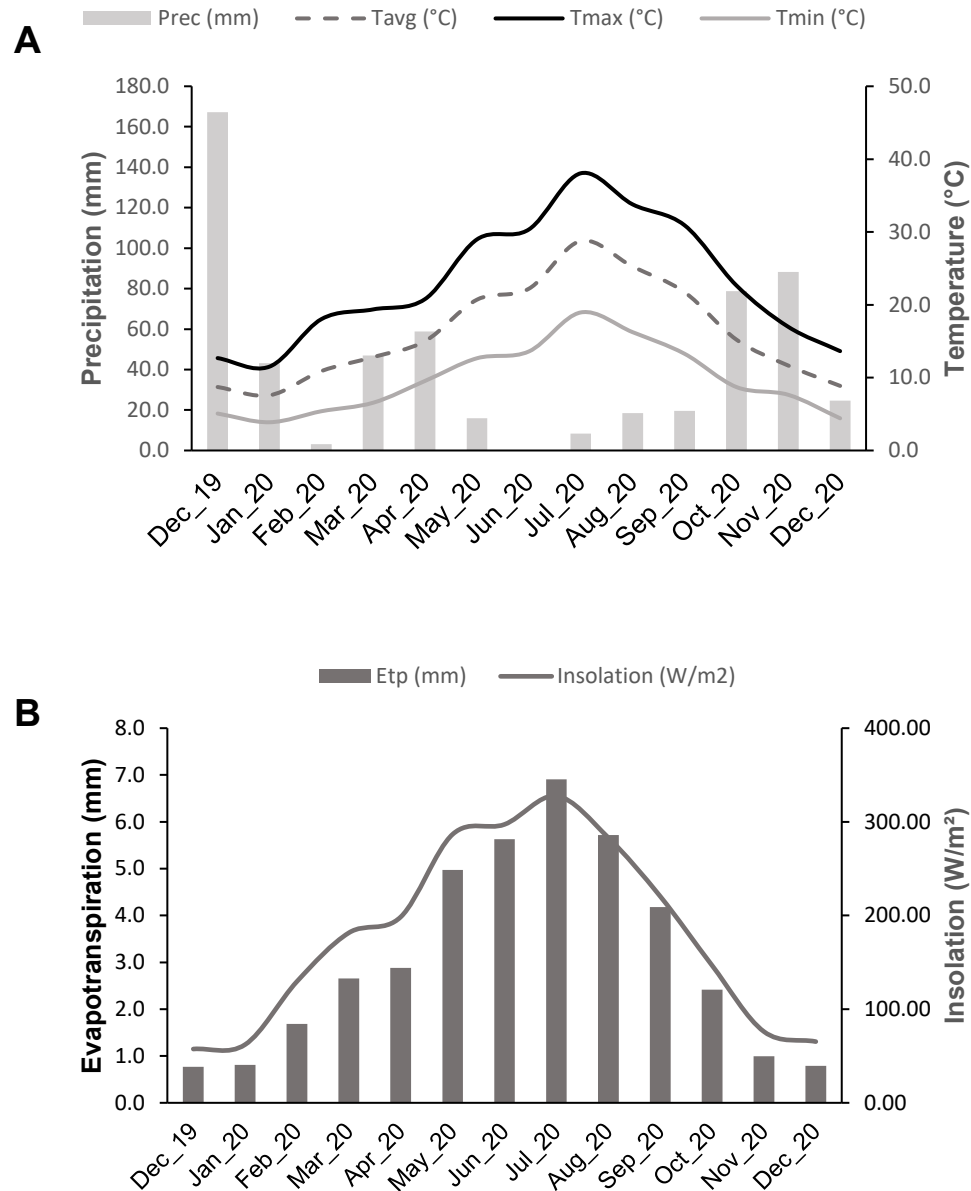

**Figure S3.** Monthly mean climatic conditions occurred during the 2020 vintage in the vineyard Quinta do Ataíde from the Douro Superior sub-region. A) Precipitation-Prec. (mm); Maximum temperature -Tmax-(°C); Minimum temperature – Tmin (°C) and Average temperature – Tavg (°C). B) Evapotranspiration - Etp (mm); Insolation – Insol. (W/m<sup>2</sup>).

**Table S1.** Berry quality attributes during maturation until harvest (eight weeks after *veraison* - WAV) in 2018 vintage. Irrigation conditions: R0 = non-irrigated plants; R30 = deficit irrigation corresponding to 30% of evapotranspiration; R70 = deficit irrigation corresponding to 70% of evapotranspiration. <sup>1</sup> Sig. indicate significant differences between varieties: “n.s.” – not

| Berry quality    | Treatment         | WAV 4    | WAV 5   | WAV 6   | WAV 7   | WAV 8     |
|------------------|-------------------|----------|---------|---------|---------|-----------|
| Berry weight (g) | R0                | 1.055 b  | 1.061 b | 1.109 b | 1.148 b | 1.093     |
|                  | R30               | 1.341 ab | 1.433 a | 1.416 a | 1.506 a | 1.311     |
|                  | R70               | 1.505 a  | 1.479 a | 1.571 a | 1.507 a | 1.390     |
|                  | Sig. <sup>1</sup> | **       | **      | **      | *       | n.s.      |
| pH               | R0                | 3.325    | 3.625   | 3.470   | 4.410   | 3.725     |
|                  | R30               | 3.330    | 3.565   | 3.483   | 3.725   | 3.740     |
|                  | R70               | 3.413    | 3.608   | 3.538   | 3.760   | 3.795     |
|                  | Sig. <sup>1</sup> | n.s.     | n.s.    | n.s.    | n.s.    | n.s.      |
| TSS (°Brix)      | R0                | 18.662   | 19.094  | 20.295  | 21.294  | 22.622 b  |
|                  | R30               | 19.116   | 19.764  | 20.840  | 22.316  | 23.927 ab |
|                  | R70               | 21.137   | 21.492  | 22.194  | 23.387  | 25.205 a  |
|                  | Sig. <sup>1</sup> | n.s.     | n.s.    | n.s.    | n.s.    | *         |
| Total Acidity    | R0                | 6.558 a  | 4.775   | 5.645   | 4.510   | 4.283     |
|                  | R30               | 6.280 ab | 4.695   | 5.418   | 4.143   | 4.163     |
|                  | R70               | 5.453 b  | 4.440   | 4.780   | 3.965   | 3.998     |
|                  | Sig. <sup>1</sup> | *        | n.s.    | n.s.    | n.s.    | n.s.      |
| Malic Acid       | R0                | 1.600    | 1.075   | 0.875   | 1.050   | 0.975     |
|                  | R30               | 1.525    | 1.025   | 0.875   | 0.950   | 0.975     |
|                  | R70               | 1.200    | 0.900   | 0.625   | 0.850   | 0.775     |
|                  | Sig. <sup>1</sup> | n.s.     | n.s.    | n.s.    | n.s.    | n.s.      |
| YAN              | R0                | 288.125  | 251.300 | 268.200 | 234.975 | 271.500   |
|                  | R30               | 258.750  | 192.025 | 224.225 | 203.375 | 222.225   |
|                  | R70               | 202.000  | 187.525 | 194.725 | 161.775 | 204.400   |
|                  | Sig. <sup>1</sup> | n.s.     | n.s.    | n.s.    | n.s.    | n.s.      |
| Total Phenols    | R0                | 11.703   | 16.473  | 14.683  | 14.788  | 17.628    |
|                  | R30               | 8.824    | 12.591  | 11.183  | 12.874  | 13.551    |
|                  | R70               | 8.391    | 11.169  | 10.619  | 13.894  | 13.191    |
|                  | Sig. <sup>1</sup> | n.s.     | n.s.    | n.s.    | n.s.    | n.s.      |

significant; “\*” –  $p < 0.05$ ; “\*\*\*” –  $p < 0.01$ .

**Table S2.** Berry quality attributes during maturation until harvest (from four to eight week after *veraison* - WAV) in 2018 vintage. Irrigation conditions: R0 = non-irrigated plants; R30 = deficit irrigation corresponding to 30% of evapotranspiration; R70 = deficit irrigation corresponding to 70% of evapotranspiration.

| Berry quality   | R0A    | R0B    | R0C    | R0D    | R30A   | R30B   | R30C   | R30D   | R70A   | R70B   | R70C   | R70D   |
|-----------------|--------|--------|--------|--------|--------|--------|--------|--------|--------|--------|--------|--------|
| Berry weight 4  | 0.926  | 0.948  | 0.904  | 1.44   | 1.234  | 1.35   | 1.354  | 1.426  | 1.462  | 1.468  | 1.552  | 1.538  |
| Berry weight 5  | 1.014  | 0.91   | 0.908  | 1.41   | 1.306  | 1.43   | 1.518  | 1.478  | 1.51   | 1.368  | 1.606  | 1.43   |
| Berry weight 6  | 1.066  | 0.946  | 1.004  | 1.42   | 1.312  | 1.402  | 1.528  | 1.422  | 1.478  | 1.562  | 1.594  | 1.648  |
| Berry weight 7  | 0.952  | 1.14   | 1.002  | 1.498  | 1.628  | 1.482  | 1.522  | 1.39   | 1.454  | 1.468  | 1.526  | 1.578  |
| Berry weight 8  | 0.948  | 1.008  | 1.034  | 1.38   | 1.222  | 1.182  | 1.492  | 1.346  | 1.406  | 1.236  | 1.496  | 1.422  |
| pH 4            | 3.3    | 3.3    | 3.23   | 3.47   | 3.28   | 3.28   | 3.33   | 3.43   | 3.34   | 3.4    | 3.58   | 3.33   |
| pH 5            | 3.59   | 3.62   | 3.65   | 3.64   | 3.54   | 3.42   | 3.72   | 3.58   | 3.54   | 3.52   | 3.76   | 3.61   |
| pH 6            | 3.42   | 3.43   | 3.44   | 3.59   | 3.43   | 3.47   | 3.5    | 3.53   | 3.45   | 3.45   | 3.77   | 3.48   |
| pH 7            | 3.6    | 3.64   | 3.66   | 3.74   | 3.77   | 3.64   | 3.73   | 3.76   | 3.74   | 3.69   | 3.96   | 3.65   |
| pH 8            | 3.65   | 3.82   | 3.69   | 3.74   | 3.71   | 3.68   | 3.77   | 3.8    | 3.72   | 3.77   | 3.96   | 3.73   |
| TSS 4           | 18.378 | 19.044 | 18.216 | 19.008 | 18.594 | 18.702 | 19.404 | 19.764 | 19.098 | 21.024 | 24.894 | 19.53  |
| TSS 5           | 18.684 | 18.9   | 19.206 | 19.584 | 18.864 | 19.71  | 20.142 | 20.34  | 19.638 | 21.672 | 24.426 | 20.232 |
| TSS 6           | 20.142 | 20.124 | 20.178 | 20.736 | 20.484 | 20.97  | 20.754 | 21.15  | 21.024 | 21.438 | 25.686 | 20.628 |
| TSS 7           | 21.276 | 21.096 | 21.096 | 21.708 | 21.708 | 22.248 | 22.572 | 22.734 | 22.05  | 22.716 | 26.334 | 22.446 |
| TSS 8           | 22.662 | 22.698 | 21.87  | 23.256 | 23.076 | 23.688 | 24.516 | 24.426 | 24.102 | 25.074 | 27.846 | 23.796 |
| Total acidity 4 | 6.69   | 6.46   | 7.12   | 5.96   | 6.57   | 6.26   | 6.03   | 6.26   | 5.53   | 5.7    | 4.62   | 5.96   |
| Total acidity 5 | 4.9    | 4.76   | 4.82   | 4.62   | 4.71   | 4.46   | 4.7    | 4.91   | 4.46   | 4.98   | 3.88   | 4.44   |
| Total acidity 6 | 5.89   | 5.75   | 5.89   | 5.05   | 5.5    | 5.05   | 5.12   | 6      | 5.02   | 5.13   | 3.8    | 5.17   |
| Total acidity 7 | 4.83   | 4.47   | 4.44   | 4.3    | 4.02   | 4.25   | 4.12   | 4.18   | 3.86   | 4.24   | 3.32   | 4.44   |
| Total acidity 8 | 4.63   | 3.94   | 4.22   | 4.34   | 4.22   | 4.2    | 4.07   | 4.16   | 4.15   | 4.21   | 3.33   | 4.3    |
| Malic acid 4    | 1.6    | 1.2    | 1.5    | 2.1    | 1.4    | 1.2    | 1.4    | 2.1    | 1.2    | 1.4    | 0.8    | 1.4    |
| Malic acid 5    | 1.2    | 0.7    | 1      | 1.4    | 0.9    | 0.7    | 1.1    | 1.4    | 0.8    | 1.1    | 0.6    | 1.1    |
| Malic acid 6    | 0.7    | 0.7    | 0.8    | 1.3    | 0.7    | 0.5    | 0.8    | 1.5    | 0.6    | 0.8    | 0.2    | 0.9    |
| Malic acid 7    | 0.9    | 0.8    | 1      | 1.5    | 1      | 0.6    | 0.9    | 1.3    | 0.8    | 0.9    | 0.7    | 1      |
| Malic acid 8    | 0.8    | 0.8    | 1.1    | 1.2    | 0.9    | 0.5    | 0.9    | 1.6    | 0.7    | 0.8    | 0.7    | 0.9    |
| YAN 4           | 259.7  | 252.7  | 288    | 352.1  | 245.6  | 187.1  | 235.4  | 366.9  | 262    | 148.1  | 131.4  | 266.5  |
| YAN 5           | 276.9  | 199.7  | 270.2  | 258.4  | 228.2  | 112.2  | 174.3  | 253.4  | 228.2  | 147.8  | 137.2  | 236.9  |
| YAN 6           | 222.4  | 236.6  | 279.4  | 334.4  | 248.1  | 173.7  | 232.1  | 243    | 271.9  | 133.7  | 150.7  | 222.6  |
| YAN 7           | 207.4  | 196.5  | 228.8  | 307.2  | 204.1  | 158.3  | 212.7  | 238.4  | 227.3  | 93.6   | 95.8   | 230.4  |
| YAN 8           | 236.1  | 226.7  | 264.9  | 358.3  | 225.3  | 137.6  | 239.4  | 286.6  | 288.5  | 133.8  | 131.6  | 263.7  |
| Total phenols 4 | 11.398 | 14.358 | 13.378 | 7.679  | 9.649  | 8.549  | 7.669  | 9.429  | 6.409  | 8.579  | 11.648 | 6.929  |

| Berry quality        | R0A    | R0B    | R0C    | R0D    | R30A   | R30B   | R30C   | R30D   | R70A   | R70B   | R70C   | R70D   |
|----------------------|--------|--------|--------|--------|--------|--------|--------|--------|--------|--------|--------|--------|
| Total phenols 5      | 15.848 | 21.047 | 19.548 | 9.449  | 11.618 | 14.328 | 15.088 | 9.329  | 9.539  | 11.868 | 13.718 | 9.549  |
| Total phenols 6      | 14.338 | 18.328 | 15.388 | 10.679 | 11.788 | 11.968 | 11.898 | 9.079  | 8.949  | 10.769 | 13.378 | 9.379  |
| Total phenols 7      | 14.824 | 17.463 | 15.793 | 11.069 | 14.954 | 14.074 | 13.449 | 9.024  | 11.294 | 13.894 | 18.708 | 11.684 |
| Total phenols 8      | 17.548 | 23.957 | 16.908 | 12.098 | 14.148 | 14.848 | 14.128 | 11.078 | 10.879 | 14.758 | 15.598 | 11.528 |
| Number of Shoots     | 17.250 | 13.875 | 14.375 | 16.625 | 13.875 | 14.875 | 15.75  | 17.000 | 17.000 | 16.625 | 16.125 | 16.000 |
| Number of clusters 8 | 28.500 | 21.000 | 15.000 | 21.500 | 31.000 | 25.000 | 19.000 | 25.000 | 32.500 | 22.000 | 11.500 | 22.000 |
| Pruning Weight       | 0.456  | 0.368  | 0.466  | 0.533  | 0.466  | 0.404  | 0.504  | 0.653  | 0.359  | 0.346  | 0.254  | 0.448  |
| Clusters weight 8    | 1.395  | 1.25   | 1.2688 | 1.7825 | 2.0975 | 2.0063 | 1.8763 | 1.6688 | 2.1075 | 2.0775 | 0.6625 | 2.415  |
| Foliar Area          | 3.057  | 1.002  | 4.08   | 1.86   | 3.178  | 9.164  | 2.85   | 3.109  | 1.132  | 3.787  | 3.493  | 1.96   |

**Table S3.** Berry quality attributes during maturation until harvest (seven weeks after *veraison* - WAV) in 2019 vintage. Irrigation conditions: R0 = non-irrigated plants; R30 = deficit irrigation corresponding to 30% of evapotranspiration; R70 = deficit irrigation corresponding to 70% of evapotranspiration. <sup>1</sup> Sig. indicate significant differences between varieties: “n.s.” – not significant; “\*” –  $p < 0.05$ ; “\*\*” –  $p < 0.01$ ; “\*\*\*” –  $p < 0.001$ ; “\*\*\*\*” –  $p < 0.0001$ .

| Berry quality    | Treatment         | WAV 2   | WAV 4   | WAV 6   | WAV 7   |
|------------------|-------------------|---------|---------|---------|---------|
| Berry weight (g) | R0                | 1.151 b | 1.192 b | 1.282 b | 1.287 b |
|                  | R30               | 1.596 a | 1.649 a | 1.583 a | 1.531 a |
|                  | R70               | 1.583 a | 1.656 a | 1.657 a | 1.581 a |
|                  | Sig. <sup>1</sup> | ****    | ****    | ***     | ***     |
| pH               | R0                | 3.228   | 3.460   | 3.640   | 3.763   |
|                  | R30               | 3.273   | 3.525   | 3.690   | 3.833   |
|                  | R70               | 3.255   | 3.523   | 3.680   | 3.758   |
|                  | Sig. <sup>1</sup> | n.s.    | n.s.    | n.s.    | n.s.    |
| TSS (°Brix)      | R0                | 18.80   | 22.06   | 23.45   | 23.33   |
|                  | R30               | 19.53   | 22.98   | 23.95   | 23.72   |
|                  | R70               | 19.91   | 23.24   | 23.79   | 23.83   |
|                  | Sig. <sup>1</sup> | n.s.    | n.s.    | n.s.    | n.s.    |
| Total Acidity    | R0                | 7.15    | 5.08    | 4.26    | 3.62    |
|                  | R30               | 7.43    | 5.06    | 4.50    | 3.68    |
|                  | R70               | 7.72    | 5.26    | 4.58    | 4.03    |
|                  | Sig. <sup>1</sup> | n.s.    | n.s.    | n.s.    | n.s.    |
| Malic Acid       | R0                | 2.03    | 1.05    | 1.00    | 0.63 b  |
|                  | R30               | 2.70    | 1.55    | 1.33    | 1.08 a  |
|                  | R70               | 2.88    | 1.57    | 1.43    | 1.03 a  |
|                  | Sig. <sup>1</sup> | n.s.    | n.s.    | n.s.    | *       |
| YAN              | R0                | 181.20  | 210.90  | 194.50  | 215.70  |
|                  | R30               | 222.40  | 216.30  | 203.00  | 201.40  |
|                  | R70               | 218.60  | 256.60  | 204.51  | 180.20  |
|                  | Sig. <sup>1</sup> | n.s.    | n.s.    | n.s.    | n.s.    |
| Total Phenols    | R0                | 11.35   | 12.76   | 14.21   | 15.26   |
|                  | R30               | 8.83    | 12.69   | 12.35   | 14.46   |
|                  | R70               | 9.33    | 11.55   | 13.02   | 12.21   |
|                  | Sig. <sup>1</sup> | n.s.    | n.s.    | n.s.    | n.s.    |



**Table S4.** Berry quality attributes during maturation until harvest (from two to seven weeks after *veraison* - WAV), in **2019** vintage. Irrigation conditions: R0 = non-irrigated plants; R30 = deficit irrigation corresponding to 30% of evapotranspiration; R70 = deficit irrigation corresponding to 70% of evapotranspiration.

| Berry quality        | R0A    | R0B    | R0C    | R0D    | R30A   | R30B   | R30C   | R30D   | R70A   | R70B   | R70C   | R70D   |
|----------------------|--------|--------|--------|--------|--------|--------|--------|--------|--------|--------|--------|--------|
| Berry weight 2       | 1.19   | 1.07   | 1.12   | 1.22   | 1.48   | 1.67   | 1.65   | 1.58   | 1.67   | 1.50   | 1.55   | 1.61   |
| Berry weight 4       | 1.21   | 1.18   | 1.17   | 1.21   | 1.60   | 1.63   | 1.71   | 1.65   | 1.72   | 1.61   | 1.65   | 1.64   |
| Berry weight 6       | 1.32   | 1.22   | 1.26   | 1.33   | 1.52   | 1.54   | 1.65   | 1.62   | 1.70   | 1.53   | 1.63   | 1.76   |
| Berry weight 7       | 1.28   | 1.26   | 1.20   | 1.40   | 1.51   | 1.44   | 1.61   | 1.57   | 1.63   | 1.53   | 1.54   | 1.63   |
| pH 2                 | 3.28   | 3.18   | 3.12   | 3.33   | 3.31   | 3.35   | 3.17   | 3.26   | 3.25   | 3.19   | 3.33   | 3.25   |
| pH 4                 | 3.51   | 3.46   | 3.40   | 3.47   | 3.59   | 3.56   | 3.49   | 3.46   | 3.55   | 3.53   | 3.51   | 3.50   |
| pH 6                 | 3.69   | 3.71   | 3.40   | 3.76   | 3.75   | 3.73   | 3.66   | 3.62   | 3.71   | 3.71   | 3.67   | 3.63   |
| pH 7                 | 3.78   | 3.78   | 3.70   | 3.79   | 3.86   | 3.88   | 3.84   | 3.75   | 3.80   | 3.78   | 3.73   | 3.72   |
| TSS 2                | 19.71  | 19.49  | 18.04  | 17.96  | 20.39  | 20.64  | 18.95  | 18.13  | 19.28  | 20.16  | 20.86  | 19.35  |
| TSS 4                | 22.55  | 23.00  | 21.29  | 21.40  | 23.72  | 23.83  | 22.46  | 21.89  | 22.41  | 23.99  | 24.08  | 22.48  |
| TSS 6                | 23.76  | 24.03  | 23.04  | 22.97  | 24.733 | 24.79  | 23.54  | 22.75  | 23.31  | 24.14  | 24.41  | 23.31  |
| TSS 7                | 24.12  | 23.832 | 23.004 | 22.356 | 23.922 | 24.84  | 23.814 | 22.32  | 22.644 | 25.02  | 24.282 | 23.31  |
| Total acidity 2      | 6.74   | 6.91   | 7.92   | 7.04   | 7.1    | 6.46   | 8.02   | 8.14   | 7.51   | 8.51   | 7.18   | 7.68   |
| Total acidity 4      | 4.88   | 4.95   | 5.44   | 5.06   | 4.72   | 4.77   | 5.19   | 5.54   | 5.07   | 5.48   | 5.2    | 5.29   |
| Total acidity 6      | 4.25   | 4.17   | 4.54   | 4.08   | 4.38   | 4.28   | 4.64   | 4.69   | 4.32   | 4.72   | 4.55   | 4.74   |
| Total acidity 7      | 3.48   | 3.4    | 4      | 3.61   | 3.52   | 3.44   | 3.55   | 4.19   | 3.74   | 3.96   | 4.01   | 4.41   |
| Malic acid 2         | 1.9    | 1.5    | 2.2    | 2.5    | 2.4    | 2      | 2.7    | 3.7    | 2.7    | 3.2    | 2.7    | 2.9    |
| Malic acid 4         | 1.2    | 0.7    | 1.2    | 1.1    | 1.4    | 1.1    | 1.6    | 2.1    | 1.7    | 1.7    | 1.5    | 1.4    |
| Malic acid 6         | 0.9    | 0.8    | 1      | 1.3    | 1.2    | 1      | 1.3    | 1.8    | 1.6    | 1.6    | 1.1    | 1.4    |
| Malic acid 7         | 0.6    | 0.6    | 0.6    | 0.7    | 1      | 0.8    | 1.1    | 1.4    | 1.2    | 0.9    | 0.8    | 1.2    |
| YAN 2                | 184.7  | 133.3  | 160.6  | 246.1  | 246.2  | 165    | 167.9  | 310.5  | 255.8  | 200.4  | 163.4  | 254.9  |
| YAN 4                | 233.2  | 183.2  | 164.8  | 262.2  | 226.8  | 135.2  | 209.8  | 293.5  | 270.5  | 274.4  | 197.3  | 284.1  |
| YAN 6                | 189    | 174.5  | 163.9  | 250.6  | 206.5  | 155.7  | 185    | 264.9  | 230.5  | 184.8  | 159.7  | 242.8  |
| YAN 7                | 180.6  | 191.6  | 213.5  | 277    | 208.4  | 116.7  | 208.8  | 271.5  | 211.1  | 176.8  | 142.5  | 190.3  |
| Total phenols 2      | 11.832 | 10.499 | 10.932 | 12.118 | 9.319  | 10.259 | 8.152  | 7.586  | 6.772  | 9.632  | 12.078 | 8.832  |
| Total phenols 4      | 11.758 | 14.165 | 13.738 | 11.372 | 14.738 | 13.885 | 12.225 | 9.912  | 9.819  | 11.872 | 13.072 | 11.445 |
| Total phenols 6      | 12.825 | 16.711 | 13.552 | 13.765 | 12.312 | 13.905 | 13.078 | 10.092 | 11.658 | 15.118 | 13.498 | 11.818 |
| Total phenols 7      | 12.932 | 16.351 | 19.898 | 11.872 | 13.938 | 19.038 | 14.785 | 10.079 | 11.592 | 11.398 | 12.458 | 13.398 |
| Number of Shoots     | 11.75  | 10.125 | 11.375 | 11.125 | 9.000  | 9.625  | 10.25  | 12.375 | 10.75  | 11.75  | 11.375 | 11.875 |
| Number of clusters 7 | 16.25  | 16.125 | 16.75  | 17.375 | 12.125 | 18.25  | 17.75  | 24.00  | 13.25  | 16.375 | 13.25  | 15.875 |
| Pruning Weight       | 0.139  | 0.161  | 0.160  | 0.155  | 0.177  | 0.276  | 0.245  | 0.478  | 0.175  | 0.311  | 0.227  | 0.263  |
| Clusters weight 7    | 0.713  | 0.903  | 0.989  | 1.239  | 0.923  | 1.455  | 1.666  | 2.429  | 1.118  | 1.204  | 0.845  | 1.434  |
| Foliar Area          | 1.883  | 1.887  | 2.769  | 1.635  | 3.122  | 3.290  | 3.850  | 4.798  | 2.046  | 4.827  | 2.465  | 3.783  |

**Table S5.** Berry quality attributes during maturation until harvest (seven weeks after *veraison* - WAV) in 2020 vintage. Irrigation conditions: R0 = non-irrigated plants; R30 = deficit irrigation corresponding to 30% of evapotranspiration; R70 = deficit irrigation corresponding to 70% of evapotranspiration. <sup>1</sup> Sig. indicate significant differences between varieties: “n.s.” – not

| Berry quality    | Treatment         | WAV 5  | WAV 6    | WAV 7  |
|------------------|-------------------|--------|----------|--------|
| Berry weight (g) | R0                | 1.30 b | 1.22 a   | 1.23   |
|                  | R30               | 1.68 a | 1.65 ab  | 1.56   |
|                  | R70               | 1.69 a | 1.76 b   | 1.53   |
|                  | Sig. <sup>1</sup> | *      | *        | n.s.   |
| pH               | R0                | 3.63   | 3.73     | 3.81   |
|                  | R30               | 3.67   | 3.78     | 3.82   |
|                  | R70               | 3.74   | 3.75     | 3.84   |
|                  | Sig. <sup>1</sup> | n.s.   | n.s.     | n.s.   |
| TSS (°Brix)      | R0                | 19.93  | 21.55    | 22.38  |
|                  | R30               | 20.11  | 21.87    | 22.78  |
|                  | R70               | 21.89  | 22.20    | 24.26  |
|                  | Sig. <sup>1</sup> | n.s.   | n.s.     | n.s.   |
| Total Acidity    | R0                | 4.49   | 4.12     | 3.97   |
|                  | R30               | 4.30   | 3.89     | 3.81   |
|                  | R70               | 4.18   | 3.92     | 3.91   |
|                  | Sig. <sup>1</sup> | n.s.   | n.s.     | n.s.   |
| Malic Acid       | R0                | 1.23   | 0.75     | 1.05   |
|                  | R30               | 1.28   | 0.73     | 1.08   |
|                  | R70               | 1.48   | 0.70     | 1.10   |
|                  | Sig. <sup>1</sup> | n.s.   | n.s.     | n.s.   |
| YAN              | R0                | 248.80 | 252.80   | 253.80 |
|                  | R30               | 189.30 | 140.90   | 175.60 |
|                  | R70               | 215.10 | 175.70   | 198.60 |
|                  | Sig. <sup>1</sup> | n.s.   | n.s.     | n.s.   |
| Total Phenols    | R0                | 14.36  | 14.04 a  | 14.30  |
|                  | R30               | 11.22  | 11.09 ab |        |
|                  | R70               | 12.10  | 9.41 b   |        |
|                  | Sig. <sup>1</sup> | n.s.   | *        | n.s.   |

significant; “\*” –  $p < 0.05$ ; “\*\*” –  $p < 0.01$ ; “\*\*\*” –  $p < 0.001$ ; “\*\*\*\*” –  $p < 0.0001$ .

**Table S6.** Berry quality attributes during maturation until harvest (from two to seven weeks after *veraison* - WAV), in **2020** vintage. Irrigation conditions: R0 = non-irrigated plants; R30 = deficit irrigation corresponding to 30% of evapotranspiration; R70 = deficit irrigation corresponding to 70% of evapotranspiration.

| Berry quality        | R0A    | R0B    | R0C    | R0D    | R30A   | R30B   | R30C   | R30D   | R70A   | R70B   | R70C   | R70D   |
|----------------------|--------|--------|--------|--------|--------|--------|--------|--------|--------|--------|--------|--------|
| Berry weight 5       | 1.26   | 1.07   | 1.26   | 1.60   | 1.68   | 1.85   | 1.60   | 1.57   | 1.72   | 1.65   | 1.49   | 1.88   |
| Berry weight 6       | 1.31   | 1.02   | 0.98   | 1.55   | 1.74   | 1.74   | 1.53   | 1.60   | 1.72   | 1.84   | 1.39   | 2.07   |
| Berry weight 7       | 1.21   | 1.00   | 1.22   | 1.53   | 1.61   | 1.58   | 1.68   | 1.38   | 1.55   | 1.50   | 1.26   | 1.82   |
| pH 5                 | 3.76   | 3.50   | 3.57   | 3.67   | 3.80   | 3.68   | 3.58   | 3.60   | 3.67   | 3.79   | 3.72   | 3.77   |
| pH 6                 | 3.91   | 3.61   | 3.70   | 3.70   | 3.83   | 4.00   | 3.61   | 3.69   | 3.77   | 3.79   | 3.69   | 3.75   |
| pH 7                 | 3.95   | 3.63   | 3.78   | 3.88   | 3.92   | 3.93   | 3.78   | 3.65   | 3.85   | 3.91   | 3.74   | 3.84   |
| TSS 5                | 20.52  | 19.30  | 19.60  | 20.29  | 21.42  | 21.49  | 19.71  | 17.80  | 19.80  | 21.92  | 24.55  | 21.29  |
| TSS 6                | 22.03  | 21.20  | 21.83  | 21.11  | 22.50  | 23.40  | 21.83  | 19.76  | 21.44  | 22.05  | 24.01  | 21.31  |
| TSS 7                | 22.66  | 21.58  | 22.46  | 22.80  | 23.89  | 24.08  | 22.39  | 20.75  | 22.66  | 24.64  | 26.28  | 23.45  |
| Total acidity 5      | 4.18   | 4.64   | 4.47   | 4.67   | 3.95   | 4.03   | 4.37   | 4.85   | 4.31   | 3.95   | 4.15   | 4.31   |
| Total acidity 6      | 3.77   | 4.24   | 4.20   | 4.27   | 3.72   | 3.50   | 4.04   | 4.31   | 3.96   | 3.81   | 3.99   | 3.90   |
| Total acidity 7      | 3.73   | 4.32   | 4.05   | 3.79   | 3.50   | 3.57   | 3.66   | 4.49   | 3.79   | 3.81   | 4.13   | 3.89   |
| Malic acid 5         | 1.50   | 0.80   | 1.10   | 1.50   | 1.30   | 1.10   | 1.00   | 1.70   | 1.50   | 1.40   | 1.10   | 1.90   |
| Malic acid 6         | 1.10   | 0.20   | 0.80   | 0.90   | 0.80   | 0.80   | 0.30   | 1.00   | 1.00   | 0.60   | 0.30   | 0.90   |
| Malic acid 7         | 1.30   | 0.70   | 0.90   | 1.30   | 1.10   | 1.00   | 0.80   | 1.40   | 1.30   | 1.10   | 0.60   | 1.40   |
| YAN 5                | 285.90 | 182.70 | 179.50 | 347.00 | 200.70 | 120.00 | 136.70 | 299.60 | 239.70 | 202.30 | 107.80 | 310.60 |
| YAN 6                | 320.40 | 145.30 | 236.30 | 309.10 | 129.50 | 95.10  | 72.20  | 266.70 | 227.40 | 162.70 | 75.20  | 237.50 |
| YAN 7                | 309.00 | 219.00 | 183.60 | 303.60 | 163.00 | 127.00 | 150.20 | 262.20 | 218.20 | 180.00 | 105.10 | 290.90 |
| Total phenols 5      | 15.31  | 15.81  | 13.35  | 12.96  | 12.40  | 10.36  | 13.98  | 8.13   | 3.66   | 12.96  | 16.15  | 9.62   |
| Total phenols 6      | 14.38  | 14.58  | 16.06  | 11.15  | 9.53   | 13.90  | 12.16  | 8.76   | 7.99   | 9.63   | 12.04  | 8.00   |
| Total phenols 7      | 14.75  | 15.70  | 14.84  | 11.90  | 11.39  | 13.90  | 12.95  | 8.54   | 10.71  | 11.41  | 13.86  | 9.41   |
| Number of Shoots     | 16.50  | 13.13  | 13.63  | 14.13  | 13.25  | 14.25  | 14.25  | 14.50  | 16.50  | 17.63  | 14.88  | 16.00  |
| Number of clusters 7 | 17.25  | 17.50  | 18.88  | 18.25  | 16.63  | 22.13  | 21.50  | 32.75  | 20.88  | 26.88  | 20.00  | 28.00  |
| Pruning Weight       | 0.55   | 0.41   | 0.42   | 0.59   | 0.63   | 0.60   | 0.57   | 0.77   | 0.71   | 0.64   | 0.42   | 0.72   |
| Clusters weight 7    | 1.01   | 1.30   | 1.32   | 1.88   | 1.58   | 1.82   | 2.18   | 3.95   | 2.60   | 1.90   | 1.31   | 2.53   |
| Foliar Area          | 2.64   | 1.24   | 3.09   | 4.45   | 3.29   | 3.16   | 1.77   | 1.46   | 1.87   | 4.03   | 2.80   | 3.55   |

**Table S7.** Metabolites identified by UPLC-MS in mature grape berries of Touriga Nacional in 2018, 2019 and 2020 vintages from Douro region subjected to different irrigation conditions: R0 = non-irrigated plants; R30 = deficit irrigation corresponding to 30% of evapotranspiration; R70 = deficit irrigation corresponding to 70% of evapotranspiration. Values represent the mean  $\pm$  SD ( $n = 4$ ) of arbitrary units normalized by the weight of lyophilized grape berry powder.

| code | Compound                                | Group              | R0       |         |          |         |          |         | R30      |         |          |         |          |         | R70      |         |          |         |          |         |
|------|-----------------------------------------|--------------------|----------|---------|----------|---------|----------|---------|----------|---------|----------|---------|----------|---------|----------|---------|----------|---------|----------|---------|
|      |                                         |                    | 2018     |         | 2019     |         | 2020     |         | 2018     |         | 2019     |         | 2020     |         | 2018     |         | 2019     |         | 2020     |         |
|      |                                         |                    | mean     | sd      |
| m0   | L-proline                               | Amino acids        | 354429.7 | 37658.7 | 426780.4 | 59804.7 | 408503.2 | 51685.8 | 373649.9 | 87044.4 | 484751.3 | 77170.5 | 439951.3 | 7110.9  | 423435.6 | 3818.7  | 446189.1 | 69251.6 | 485141.9 | 14679.3 |
| m1   | L-leucine                               | Amino acids        | 119469.5 | 214.3   | 29777.1  | 2132.4  | 64394.6  | 3216.9  | 70631.7  | 3974.5  | 35646.7  | 8470.7  | 42415.2  | 5727.5  | 35847.3  | 2276.7  | 24665.6  | 3300.6  | 39020.4  | 3676.2  |
| m2   | L-isoleucine                            | Amino acids        | 162392.4 | 31792.4 | 50441.6  | 2478.8  | 121674.9 | 13095.7 | 121737.7 | 3118.3  | 59408.7  | 5076.0  | 80528.4  | 10297.4 | 68825.2  | 713.9   | 50590.2  | 6252.7  | 78407.0  | 7037.0  |
| m3   | phenylalanine                           | Amino acids        | 31960.4  | 4427.8  | 19287.8  | 803.1   | 37070.9  | 5221.5  | 33409.0  | 1943.5  | 25904.1  | 2417.4  | 27222.3  | 3102.1  | 20983.6  | 580.1   | 24355.4  | 2069.9  | 29364.2  | 3538.9  |
| m4   | L-tyrosine                              | Amino acids        | 33021.1  | 2239.1  | 13486.3  | 1540.1  | 31023.0  | 3349.5  | 32367.2  | 1302.3  | 22624.6  | 1861.8  | 30640.8  | 4418.8  | 20758.4  | 1140.3  | 17096.0  | 3003.4  | 30877.5  | 2937.3  |
| m5   | L-tryptophan                            | Amino acids        | 145623.4 | 25038.5 | 59351.5  | 4839.7  | 105010.3 | 8523.2  | 102685.9 | 5321.9  | 60133.9  | 6590.0  | 74746.1  | 10565.7 | 85769.1  | 9914.6  | 46011.9  | 6178.1  | 67153.4  | 5842.6  |
| m6   | cyanidin-3-O-glucoside                  | Anthocyanin di-OH  | 3972.7   | 664.8   | 12051.8  | 158.8   | 4750.0   | 512.4   | 13208.2  | 1092.3  | 11633.8  | 2232.0  | 7012.1   | 491.7   | 10106.1  | 902.8   | 13498.6  | 4346.7  | 7795.9   | 597.8   |
| m7   | peonidin-3-O-glucoside                  | Anthocyanin di-OH  | 37247.2  | 4307.3  | 76706.3  | 12490.9 | 37550.1  | 3972.7  | 102507.1 | 15199.5 | 79290.5  | 14634.1 | 48590.6  | 1503.7  | 72981.4  | 8159.1  | 83923.6  | 7316.2  | 49252.0  | 4947.9  |
| m8   | cyanidin-3-O-(6-O-acetyl)-glucoside     | Anthocyanin di-OH  | 556.5    | 42.0    | 1455.9   | 325.2   | 916.7    | 91.5    | 1776.3   | 68.2    | 1677.3   | 91.9    | 1203.4   | 59.9    | 1269.9   | 55.9    | 1825.9   | 444.0   | 1196.3   | 161.6   |
| m9   | delphinidin-3-O-glucoside               | Anthocyanin tri-OH | 24804.2  | 199.2   | 39870.0  | 5013.3  | 20987.4  | 1940.1  | 28508.8  | 2010.0  | 49804.2  | 3128.0  | 27339.8  | 1358.6  | 27601.2  | 2801.6  | 67070.7  | 20498.5 | 34867.6  | 2717.3  |
| m10  | petunidin-3-O-glucoside                 | Anthocyanin tri-OH | 41557.9  | 10860.0 | 65379.9  | 10496.3 | 50115.5  | 7046.1  | 49955.9  | 6126.2  | 74799.3  | 3205.1  | 48686.6  | 1527.5  | 48640.3  | 2449.4  | 96514.3  | 20719.9 | 59763.8  | 3302.7  |
| m11  | malvidin-3-O-glucoside                  | Anthocyanin tri-OH | 426102.1 | 19556.4 | 352206.1 | 41952.3 | 1151.9   | 114.9   | 309214.0 | 48014.8 | 324584.7 | 43840.3 | 318935.4 | 9985.4  | 327110.4 | 34355.3 | 347633.6 | 10567.3 | 314439.1 | 12844.6 |
| m12  | petunidin-3-O-(6-O-acetyl)-glucoside    | Anthocyanin tri-OH | 10557.1  | 1376.3  | 18397.1  | 2398.2  | 314596.2 | 43547.9 | 11665.1  | 1844.1  | 20372.9  | 2912.4  | 13338.4  | 448.8   | 10281.0  | 776.5   | 28719.1  | 6127.9  | 16609.2  | 1029.1  |
| m13  | malvidin-3-O-(6-O-acetyl)-glucoside     | Anthocyanin tri-OH | 309449.3 | 44547.5 | 225337.7 | 33026.5 | 11661.1  | 1406.2  | 248972.0 | 31674.6 | 228876.6 | 24980.2 | 238540.6 | 12743.3 | 245240.0 | 17988.0 | 209890.9 | 21465.4 | 236781.2 | 11232.9 |
| m14  | petunidin-3-O-(6-p-coumaroyl)-glucoside | Anthocyanin tri-OH | 22026.9  | 279.6   | 18238.1  | 1609.9  | 297292.7 | 30076.2 | 19353.4  | 2868.5  | 18810.4  | 2622.4  | 22586.9  | 2793.7  | 18710.5  | 1792.2  | 20443.3  | 2023.4  | 19674.8  | 2614.6  |
| m15  | malvidin-3-O-(6-p-coumaroyl)-glucoside  | Anthocyanin tri-OH | 258693.5 | 37277.6 | 171735.0 | 25631.5 | 16275.3  | 1324.5  | 208048.6 | 20432.2 | 171328.0 | 22214.7 | 208644.0 | 22454.2 | 216192.3 | 3827.5  | 148705.8 | 28805.6 | 186992.4 | 6335.5  |
| m16  | malvidin-3,5-O-diglucoside              | Anthocyanin tri-OH | 1734.2   | 215.3   | 1683.6   | 233.8   | 215193.7 | 19089.1 | 2142.4   | 263.6   | 1069.2   | 253.0   | 1568.3   | 136.0   | 1783.4   | 220.9   | 1048.2   | 148.0   | 1552.8   | 88.4    |
| m17  | catechin                                | Flavan-3-ols       | 2099.6   | 697.3   | 1997.0   | 292.9   | 1053.9   | 138.8   | 1736.1   | 134.0   | 2646.7   | 319.1   | 1238.1   | 136.7   | 2236.2   | 196.3   | 2928.6   | 89.9    | 1930.4   | 247.4   |
| m18  | epicatechin                             | Flavan-3-ols       | 2254.9   | 96.3    | 1576.8   | 318.8   | 953.1    | 59.9    | 2078.3   | 256.7   | 3186.5   | 468.7   | 966.9    | 118.3   | 3094.1   | 204.4   | 2502.9   | 433.4   | 1691.5   | 352.3   |

|     |                           |                |         |        |         |       |         |        |         |       |         |        |         |        |        |        |         |        |         |        |
|-----|---------------------------|----------------|---------|--------|---------|-------|---------|--------|---------|-------|---------|--------|---------|--------|--------|--------|---------|--------|---------|--------|
| m19 | catechin gallate          | Flavan-3-ols   | 81.3    | na     | 197.5   | 46.8  | 191.8   | 24.6   | 190.4   | 14.2  | 264.8   | 52.2   | 186.9   | 34.9   | 70.2   | 7.9    | 577.2   | 58.6   | 198.9   | 20.2   |
| m20 | procyanidinB1             | Flavan-3-ols   | 3400.8  | 241.3  | 2721.8  | 318.2 | 3148.9  | 188.3  | 2681.4  | 194.6 | 2488.7  | 300.8  | 2603.3  | 484.0  | 2544.1 | 132.1  | 2918.9  | 329.3  | 2840.9  | 302.7  |
| m21 | procyanidinB2             | Flavan-3-ols   | 4935.5  | 136.2  | 3637.9  | 503.2 | 3053.5  | 420.6  | 3709.4  | 176.9 | 4297.5  | 756.6  | 2827.0  | 361.0  | 3721.6 | 280.6  | 4001.4  | 503.4  | 3582.2  | 379.9  |
| m22 | procyanidinB3             | Flavan-3-ols   | 937.5   | 68.6   | 1133.8  | 132.4 | 624.2   | 120.4  | 852.2   | 30.7  | 1414.6  | 176.0  | 829.7   | 135.7  | 946.7  | 41.6   | 1367.9  | 81.0   | 971.7   | 83.4   |
| m23 | procyanidinB4             | Flavan-3-ols   | 1862.9  | 276.6  | 1387.9  | 226.7 | 963.6   | 59.7   | 1422.5  | 148.4 | 1942.3  | 433.6  | 862.5   | 133.4  | 1478.7 | 74.9   | 1665.0  | 201.8  | 1057.1  | 164.0  |
| m24 | procyanidin gallate 1     | Flavan-3-ols   | 368.9   | 55.1   | 709.4   | 2.9   | 792.6   | 128.5  | 571.3   | 93.4  | 883.0   | 93.5   | 893.5   | 149.1  | 641.8  | 13.3   | 687.6   | 155.7  | 712.4   | 79.6   |
| m25 | procyanidin trimer 2      | Flavan-3-ols   | 1605.3  | 233.3  | 1219.4  | 112.5 | 1296.0  | 69.6   | 1271.6  | 177.7 | 1487.5  | 176.9  | 1125.2  | 192.6  | 1584.7 | 118.5  | 1618.8  | 165.0  | 1179.6  | 32.4   |
| m26 | procyanidin gallate 2     | Flavan-3-ols   | 898.4   | 6.6    | 709.4   | 117.0 | 691.5   | 75.3   | 566.2   | 57.1  | 736.4   | 81.3   | 647.7   | 93.0   | 718.5  | 34.8   | 809.4   | 108.1  | 617.3   | 18.8   |
| m27 | procyanidin trimer1       | Flavan-3-ols   | 988.4   | 34.8   | 644.5   | 44.6  | 838.1   | 179.0  | 729.4   | 47.8  | 852.2   | 115.5  | 603.7   | 103.4  | 696.3  | 36.0   | 895.5   | 90.0   | 753.9   | 81.7   |
| m28 | kaempferol-3-O-glucoside  | Flavonols      | 425.8   | 71.3   | 456.7   | 50.6  | 68.2    | 7.8    | 301.7   | 47.3  | 564.9   | 157.6  | 484.7   | 47.2   | 150.7  | 24.4   | 668.3   | 153.5  | 365.1   | 16.5   |
| m29 | quercetin-3-O-glucoside   | Flavonols      | 1322.4  | 101.8  | 2528.6  | 224.8 | 1480.6  | 167.0  | 1905.5  | 192.8 | 2816.1  | 575.8  | 2018.0  | 299.3  | 1524.9 | 257.3  | 3860.9  | 110.4  | 1806.8  | 146.9  |
| m30 | quercetin-3-O-glucuronide | Flavonols      | 2420.4  | 419.1  | 4339.7  | 287.7 | 1712.4  | 196.6  | 3170.7  | 507.2 | 4002.0  | 532.5  | 2221.3  | 171.5  | 3480.2 | 573.9  | 4816.3  | 1561.9 | 2060.7  | 176.6  |
| m31 | myricetin-hexoside1       | Flavonols      | 527.8   | 51.9   | 1202.6  | 195.5 | 488.3   | 31.2   | 1737.6  | 250.2 | 1074.2  | 134.5  | 762.9   | 68.6   | 1122.9 | 70.8   | 1218.4  | 165.4  | 800.0   | 42.7   |
| m32 | myricetin glucoside       | Flavonols      | 5564.2  | 717.9  | 5002.7  | 280.4 | 5030.4  | 522.2  | 4233.4  | 599.0 | 5247.3  | 683.3  | 4360.7  | 503.0  | 3374.4 | 500.0  | 6087.4  | 320.8  | 4315.0  | 123.9  |
| m33 | quercetin derivative      | Flavonols      | 774.3   | 45.8   | 1115.5  | 212.4 | 822.7   | 169.6  | 842.1   | 94.2  | 1256.8  | 112.2  | 809.8   | 43.2   | 851.3  | 83.3   | 1642.3  | 414.8  | 929.2   | 103.7  |
| m34 | kaempferol-3-O-rutinoside | Flavonols      | 71.4    | na     | 88.8    | 7.6   | 133.9   | 9.0    | 170.2   | 7.4   | 114.9   | 3.0    | 90.6    | 17.2   | 150.4  | 14.5   | 116.3   | 30.0   | 117.6   | 19.2   |
| m35 | gallic acid               | Phenolic acids | 415.0   | 48.0   | 194.3   | 71.3  | 222.0   | 44.1   | 303.6   | 36.0  | 513.2   | 29.9   | 100.2   | 14.7   | 262.8  | 17.8   | 354.8   | 23.7   | 111.0   | 10.9   |
| m36 | citric acid               | Phenolic acids | 10409.1 | 310.0  | 8489.1  | 256.0 | 11939.4 | 752.3  | 10227.5 | 431.8 | 9948.4  | 980.7  | 10761.7 | 1437.5 | 9139.6 | 1218.9 | 12354.0 | 1273.2 | 10327.6 | 1124.2 |
| m37 | coutaric acid             | Phenolic acids | 9414.7  | 5.4    | 6669.4  | 297.6 | 4841.0  | 484.1  | 7560.0  | 474.8 | 6201.4  | 918.1  | 5402.0  | 338.6  | 6834.3 | 958.5  | 7921.3  | 161.3  | 5218.1  | 148.6  |
| m38 | caftaric acid             | Phenolic acids | 11682.9 | 2406.3 | 11399.9 | 788.3 | 10466.1 | 1049.5 | 11680.3 | 215.0 | 11161.3 | 1452.7 | 10105.2 | 1059.5 | 9911.6 | 162.5  | 12101.1 | 1268.4 | 9567.9  | 581.1  |
| m39 | fertaric acid             | Phenolic acids | 1274.2  | 333.3  | 1420.2  | 105.6 | 1373.5  | 92.5   | 1234.6  | 151.7 | 1324.9  | 196.6  | 1287.1  | 154.3  | 1277.9 | 104.9  | 1536.0  | 188.0  | 1175.8  | 59.4   |
| m40 | resveratrol               | Stilbenoid DP1 | na      | na     | 75.7    | 6.9   | 8.2     | 5.7    | 179.7   | 25.9  | 68.5    | 10.2   | 32.1    | 5.1    | 53.3   | 6.9    | 96.4    | 22.9   | 12.5    | 0.8    |
| m41 | piceid                    | Stilbenoid DP1 | 1567.8  | 113.1  | 1711.4  | 270.6 | 146.8   | 33.5   | 3234.5  | 471.4 | 2130.8  | 550.4  | 618.9   | 83.1   | 1697.5 | 76.6   | 580.1   | 300.5  | 779.9   | 87.2   |
| m42 | pallidol                  | Stilbenoid DP2 | 66.2    | 227.9  | 137.6   | 158.5 | 182.9   | 219.4  | 11.5    | 42.6  | 63.1    | 9.1    | 36.4    | 12.3   | 15.6   | 58.6   | 32.2    | 1.2    | 7.8     | 10.4   |
| m43 | e-viniferin               | Stilbenoid DP2 | 30.1    | na     | 53.9    | na    | na      | na     | 12.4    | 20.3  | 14.3    | na     | na      | na     | na     | na     | na      | 1.7    | 3.4     | na     |
